# Supplementary material
Source: PubMed Central journal article supplement (PMC1863441)

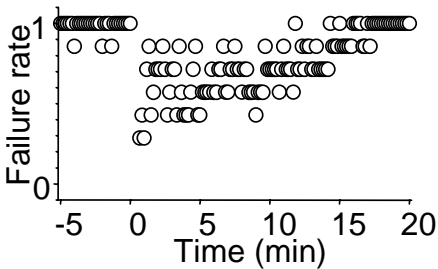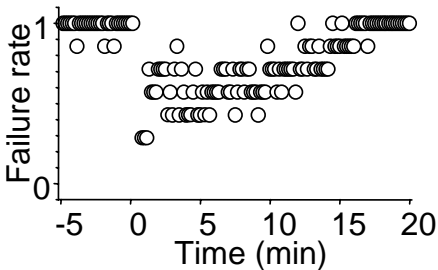

Supplement: pnas_0702164104_1.pdf [file pnas_0702164104_1.pdf]

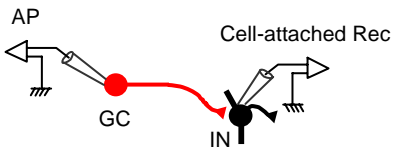

Before bursts

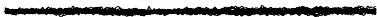

After bursts

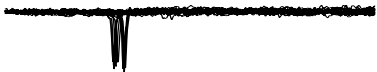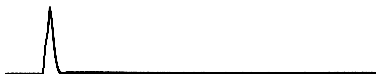

100 pA  
100 mV  
20 ms

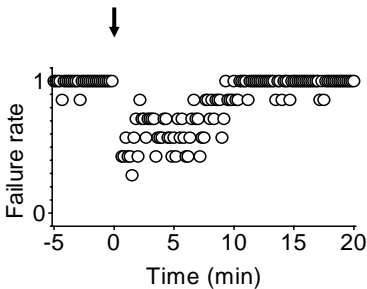

Supplement: pnas_0702164104_2.pdf [file pnas_0702164104_2.pdf]

A

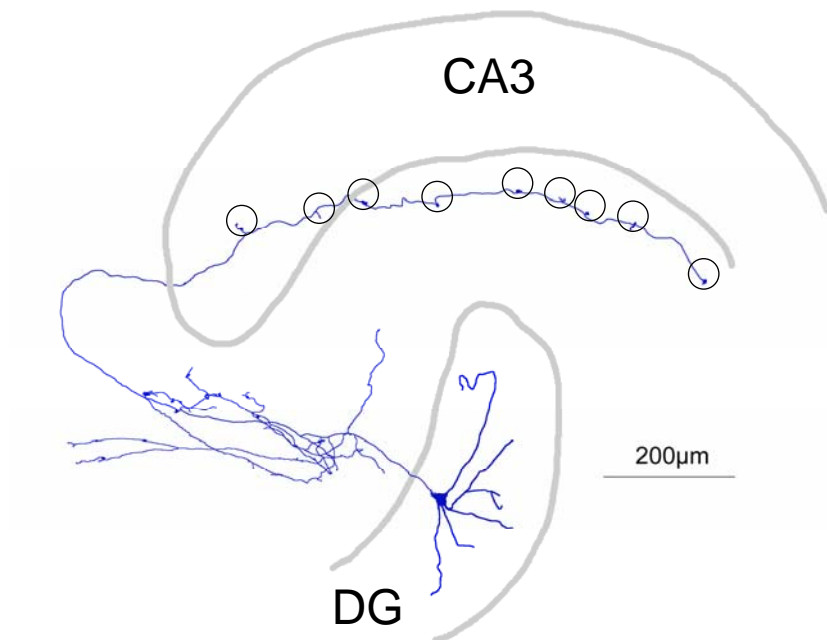

B

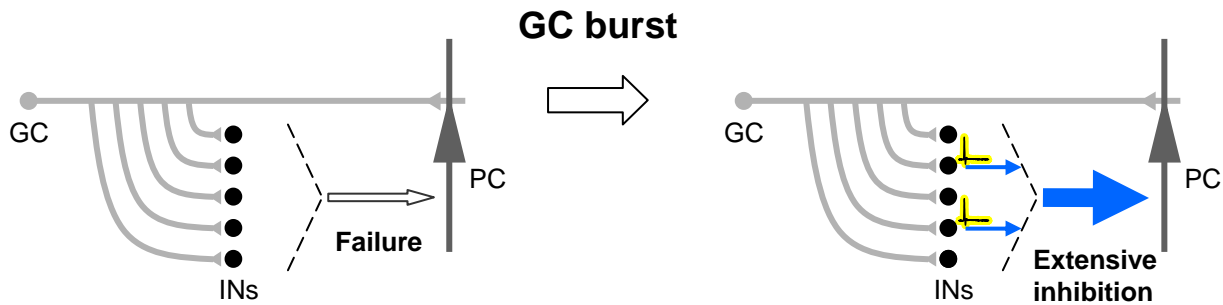

Supplement: pnas_0702164104_3.pdf [file pnas_0702164104_3.pdf]
